# Supplementary material for: Cocoa Flavanol Supplementation and the Effect on Insulin Resistance in Females Who Are Overweight or Obese: A Randomized, Placebo-Controlled Trial
Source: MDPI journal article supplement (doi:10.3390/nu15030565), 2023-01-21
Supplement: s1 [file s1]

**Supplemental Figure S1: Consort Flow Diagram**

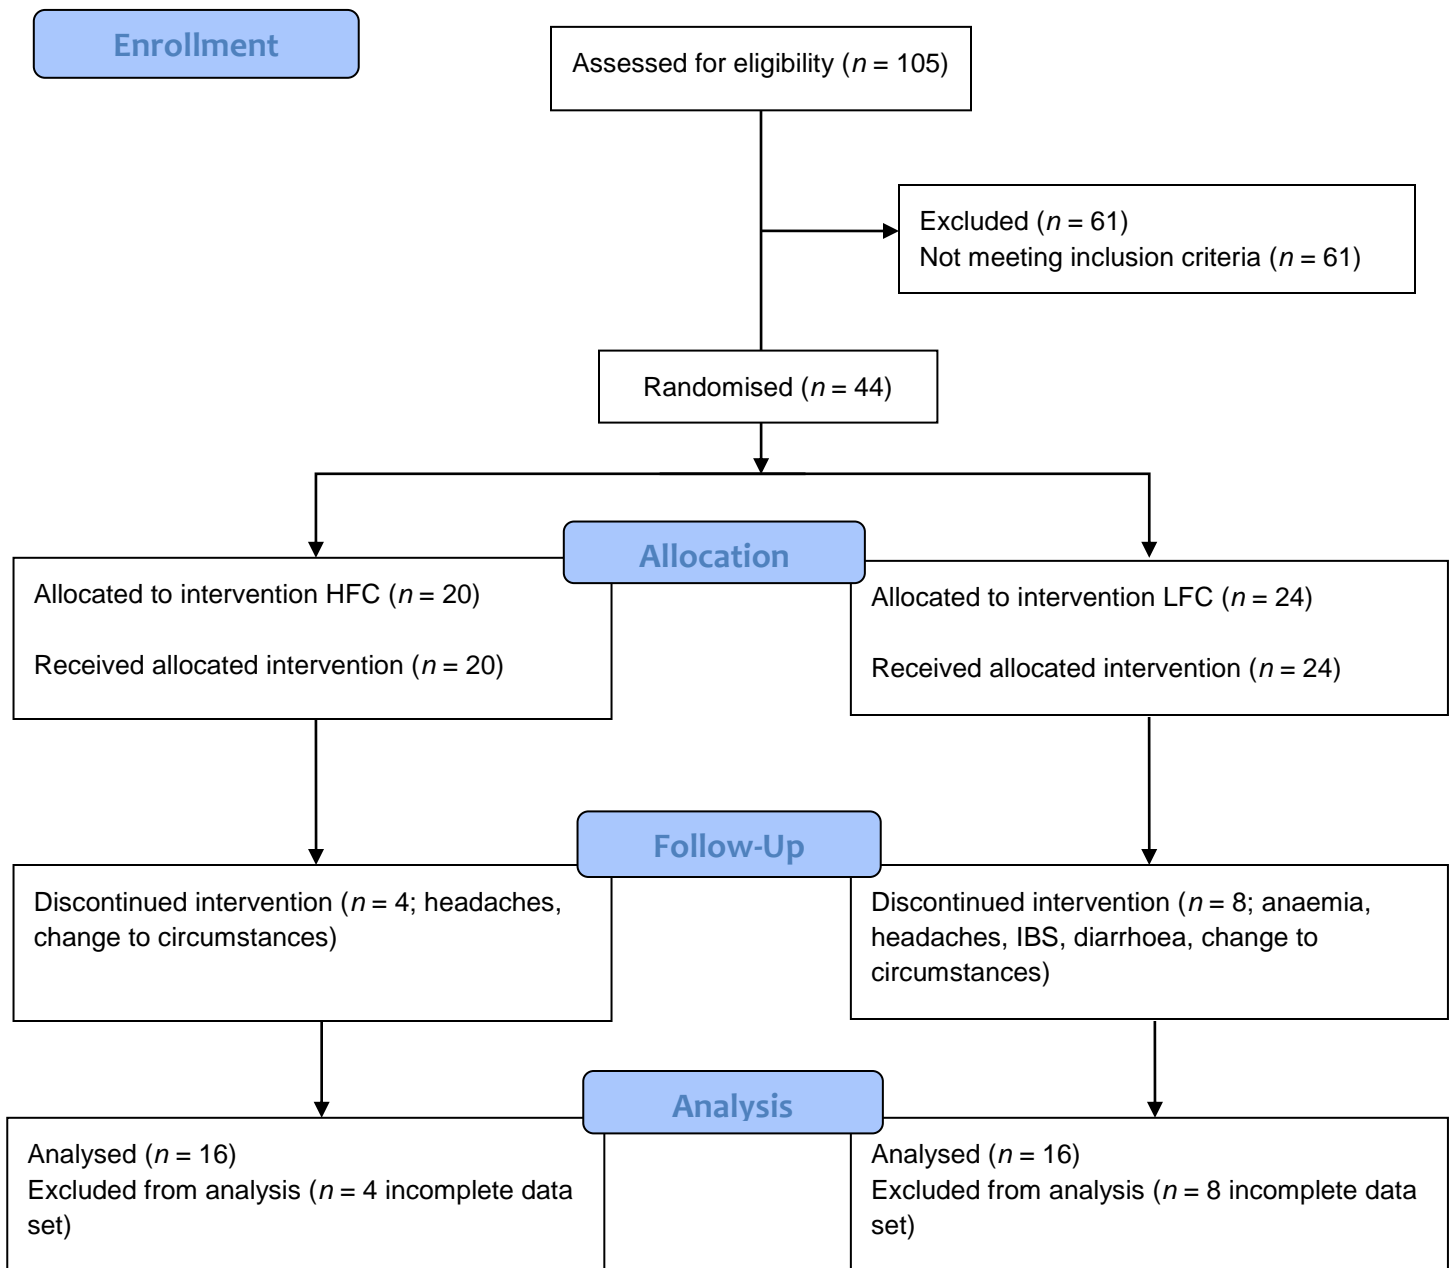

Supplementary Table S1: Nutritional content of the investigational products (information provided by manufacturer). \*Determined according to Adamson *et al* (JAFC 1999; 47(10): 4184-4188). \*\*Determined according to Machonis *et al* (J. AOAC Int. 2014;97(2): 506-509).

|                                     | <b>HFC</b> | <b>LFC</b> |
|-------------------------------------|------------|------------|
| Energy (kJ)                         | 385        | 381        |
| Total fat (g)                       | 1.0        | 1.1        |
| Saturated fat (g)                   | 0.5        | 0.6        |
| Cholesterol (mg)                    | 4.0        | 4.0        |
| Total Carbohydrates (g)             | 11.7       | 13.3       |
| Sugars (g)                          | 7.7        | 7.4        |
| Protein (g)                         | 7.2        | 7.0        |
| Dietary Fibre (g)                   | 2.1        | 2.6        |
| Copper (mg)                         | 0.3        | 0.3        |
| Magnesium (mg)                      | 64         | 59         |
| Zinc (mg)                           | 1.4        | 1.3        |
| Sodium (mg)                         | 87         | 114        |
| Potassium (mg)                      | 473        | 546        |
| Calcium (mg)                        | 182        | 185        |
| Phosphorus (mg)                     | 211        | 203        |
| Caffeine (mg)                       | 15         | 14         |
| Theobromine (mg)                    | 204        | 185        |
| Total Cocoa Flavanols DP 1-10* (mg) | 609        | 13         |
| DP 1 **                             |            |            |
| (-)-epicatechin (mg)                | 95         | 2.0        |
| (±)-catechin (mg)                   | 14         | 1.7        |
